# Supplementary material
Source: PubMed Central journal article supplement (PMC2774090)

# Supplementary Figure 1

James W. Lewis

Nov 29, 2008

IRN characteristics

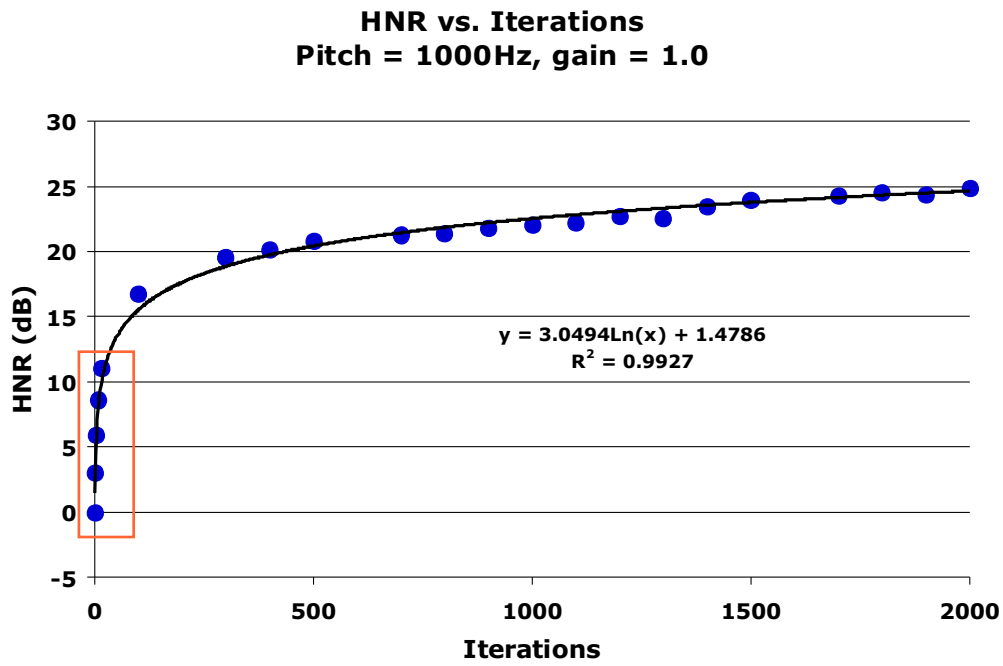

Supplement: NIHMS96955-supplement-Supp12.pdf [file NIHMS96955-supplement-Supp12.pdf]

# Supplementary Figure 2

James W. Lewis  
Nov 29, 2008  
16,000Hz Tonotopy

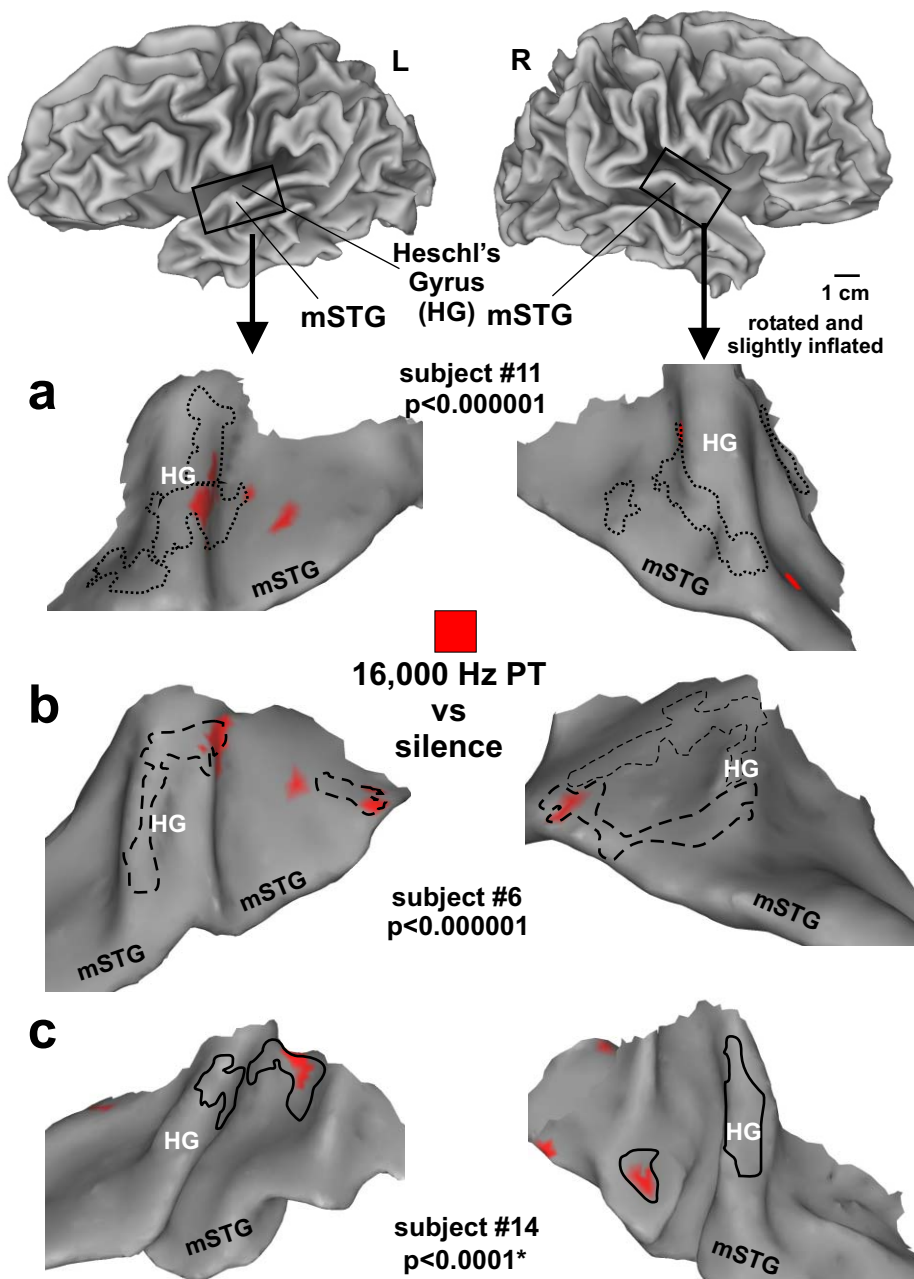

Supplement: NIHMS96955-supplement-Supp13.pdf [file NIHMS96955-supplement-Supp13.pdf]

# Supplementary Figure 4

James W. Lewis  
Nov 29, 2008  
IRN-Pitch results

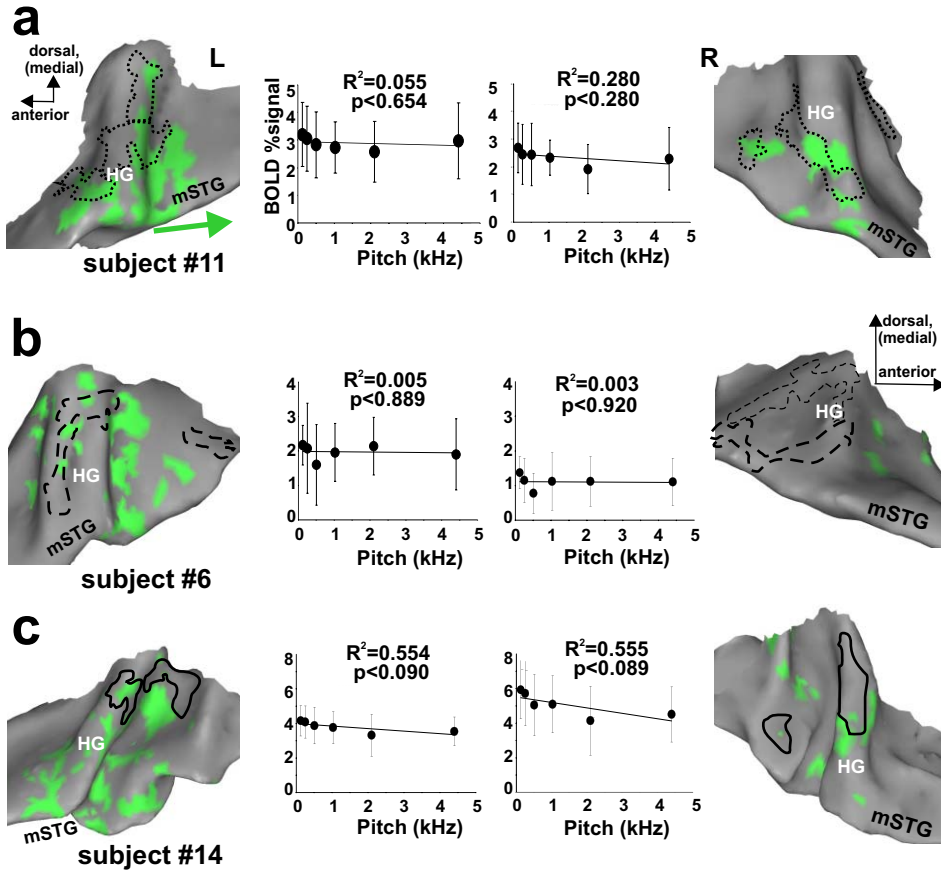

Supplement: NIHMS96955-supplement-Supp15.pdf [file NIHMS96955-supplement-Supp15.pdf]

# Supplementary Figure 5

James W. Lewis

Nov 29, 2008

IRN Loudness control

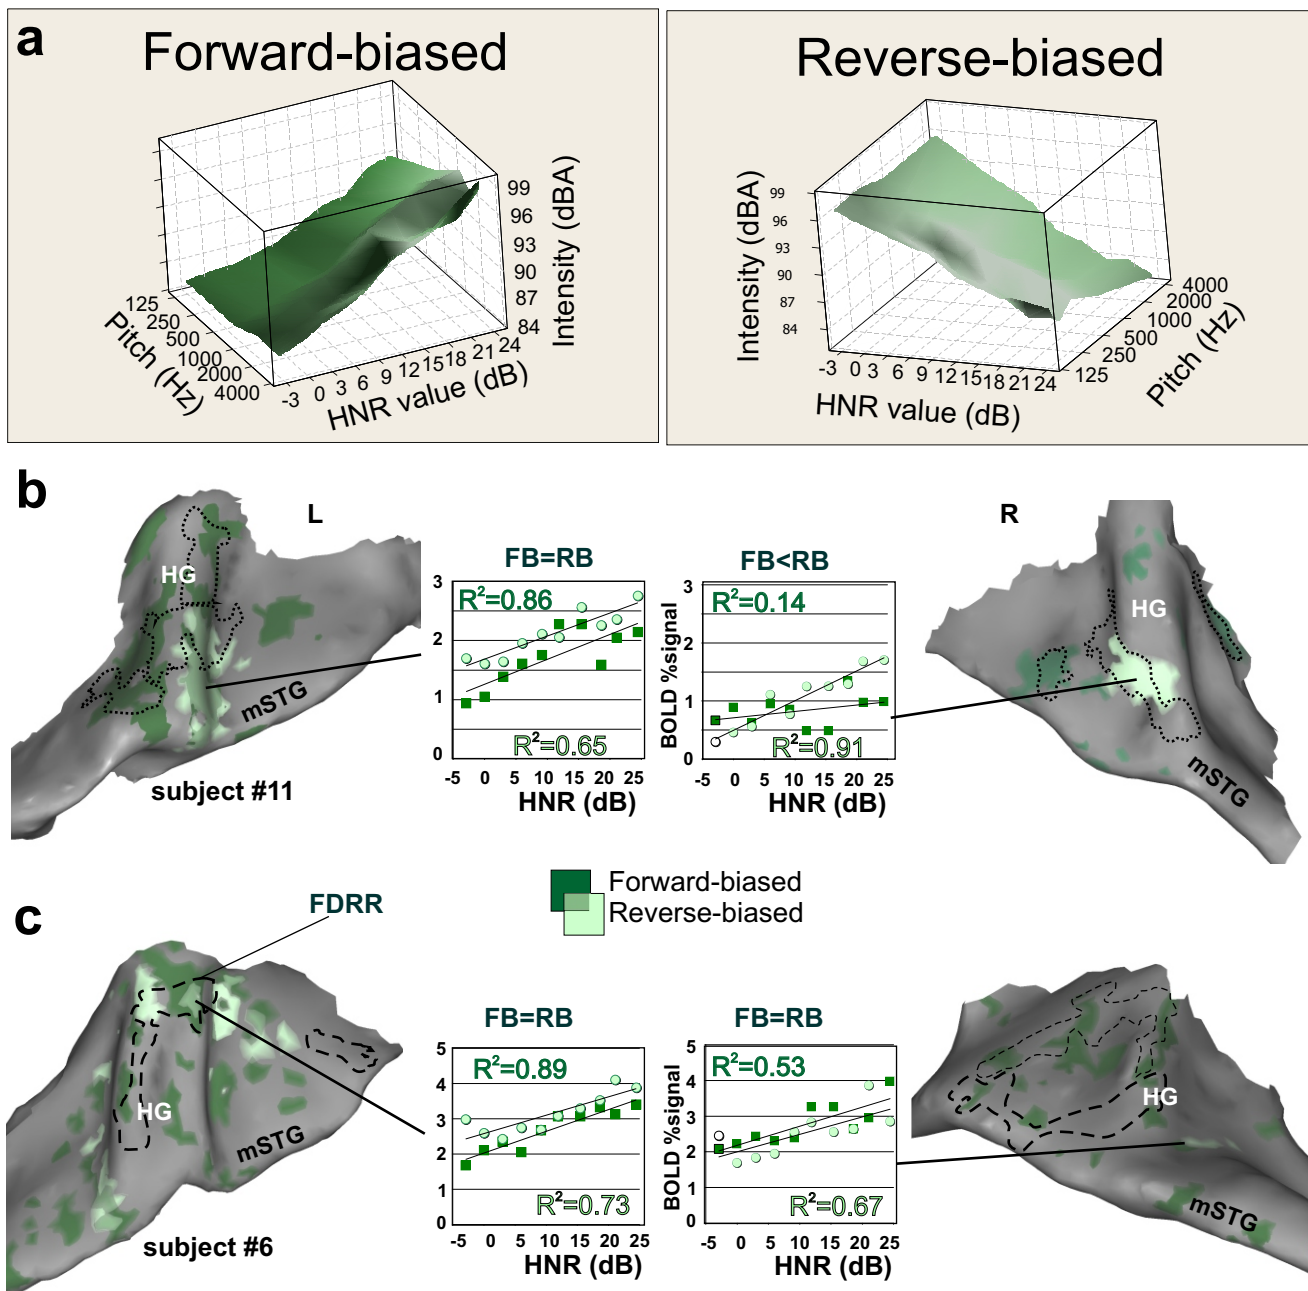

Supplement: NIHMS96955-supplement-Supp16.pdf [file NIHMS96955-supplement-Supp16.pdf]

# Supplementary Figure 6

James W. Lewis

Nov 29, 2008

Animal vocal sigmoid charts

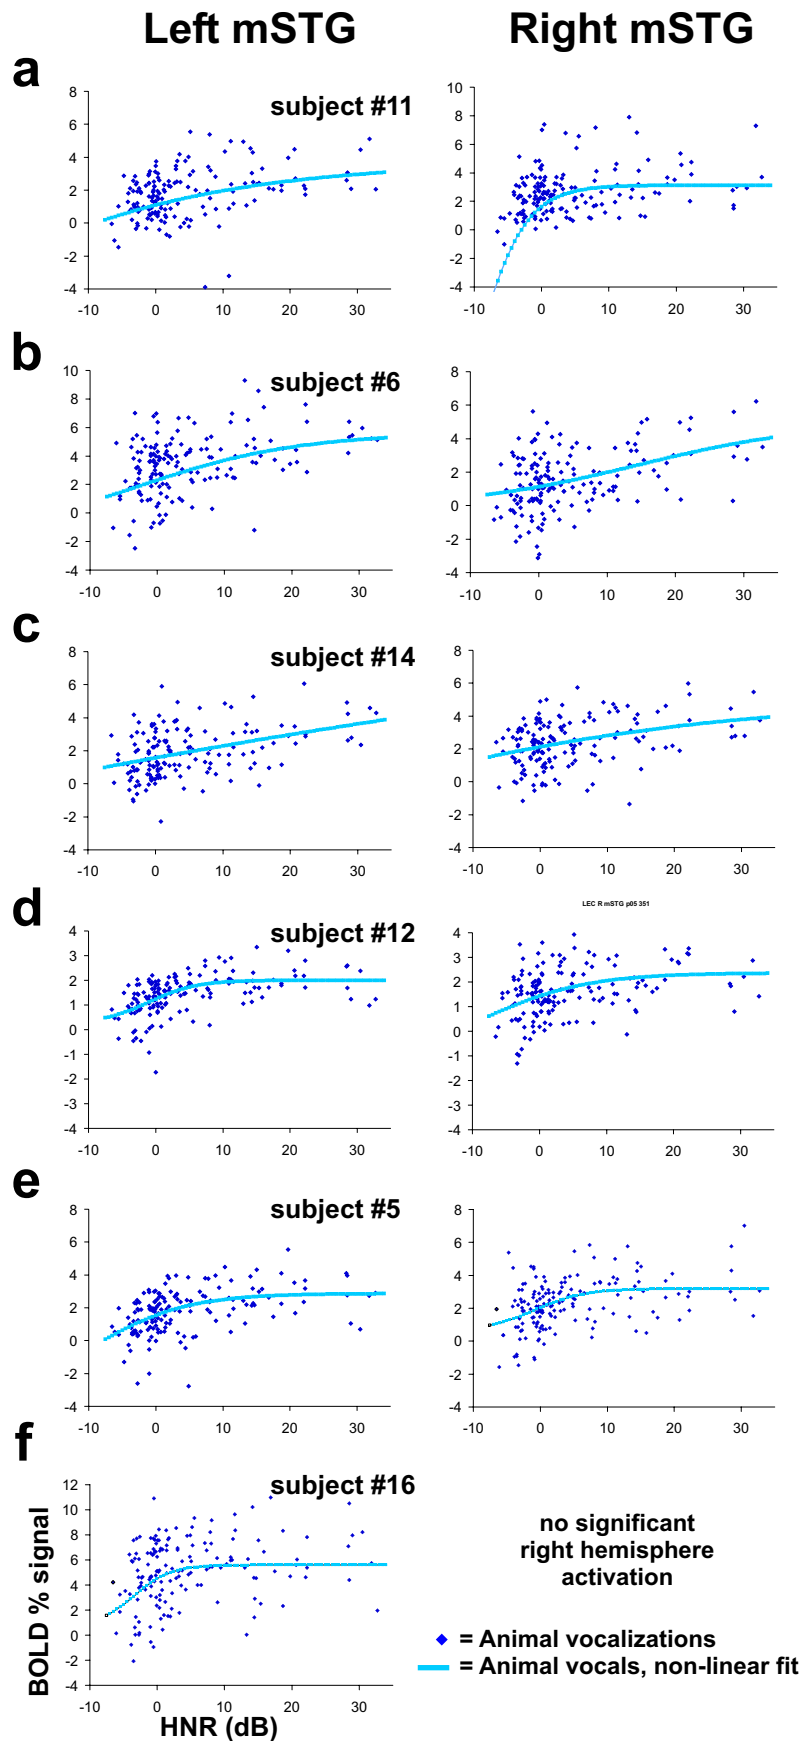

Supplement: NIHMS96955-supplement-Supp17.pdf [file NIHMS96955-supplement-Supp17.pdf]
